# Supplementary material
Source: Springer Nature journal article supplement (https://www.springerprofessional.de/resource/supplementary/40008_2012_16_MOESM2_ESM.pdf/11899446)
Supplement: MOESM2 [file 11899446]

## Appendix B. Compatibility of the IO sectors with aggregate consumption categories

Table B.1. Compatibility of the IO sectors with aggregate consumption categories

| IO sectors                                 | Aggregate consumption categories of households |
|--------------------------------------------|------------------------------------------------|
| Forestry                                   | MISC goods and services                        |
| Agriculture and Fishing                    | Food and beverages                             |
| Coal mining                                | MISC goods and services                        |
| Oil and gas extraction                     |                                                |
| Mining of non-energy materials             |                                                |
| Food                                       | Food and beverages                             |
| Textiles                                   | Clothing and footwear                          |
| Pulp and paper                             | Household articles and appliances              |
| Manufacture of coke and petroleum          | MISC goods and services                        |
| Chemicals and plastics                     | Household articles and appliances              |
| Manufacture of other non-metallic products |                                                |
| Metallurgy                                 | MISC goods and services                        |
| Machinery                                  | Household articles and appliances              |
| Other manufacture                          |                                                |
| Electricity production                     | Housing and utilities payment                  |
| Gas manufacture                            |                                                |
| Hot water supply                           |                                                |
| Water purification and distribution        |                                                |
| Construction                               | MISC goods and services                        |
| Trade and repair                           |                                                |
| Hotels and restaurants                     | Restaurants and hotels                         |
| Transport                                  | Transport and Communications                   |
| Finance                                    | MISC goods and services                        |
| Business activities                        |                                                |
| Public administration                      |                                                |
| Education                                  | Education                                      |
| Health care                                | Health care                                    |
| Other                                      | MISC goods and services                        |
